# Supplementary material
Source: HighWire-hosted journal article supplement (https://ard.bmj.com/content/79/8/1111)

A

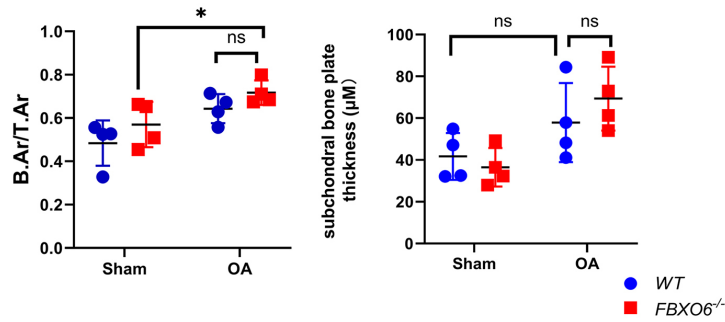

B

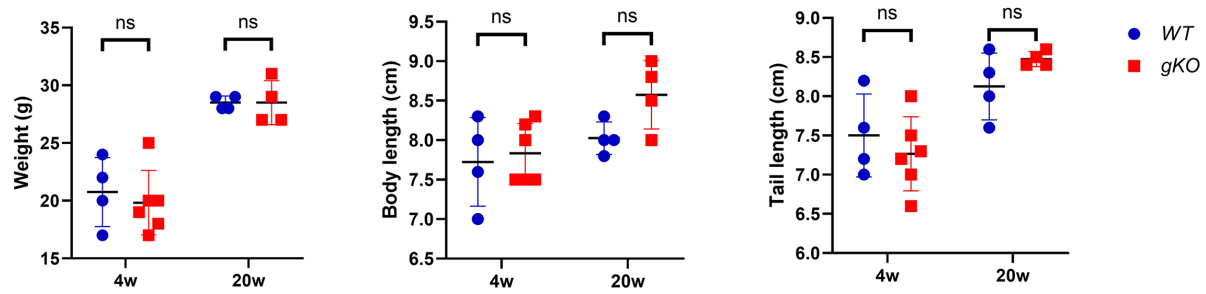

C

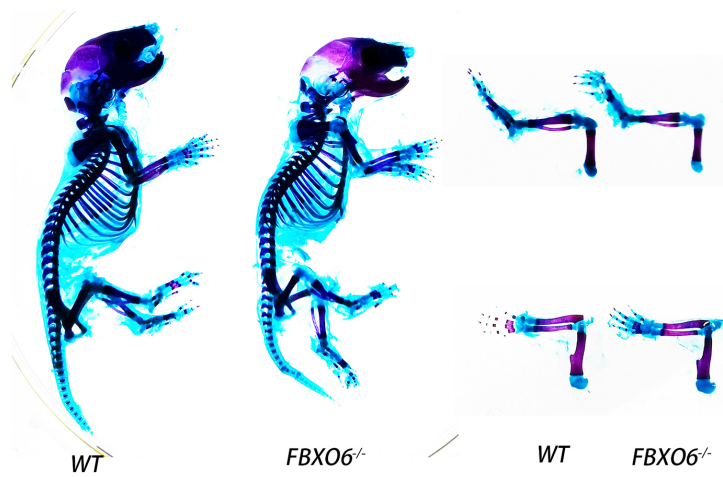

D

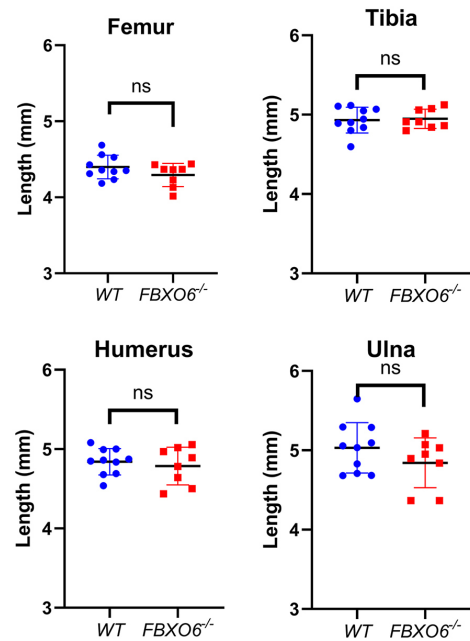

Supplement: inline-supplementary-material-4 [file inline-supplementary-material-4.pdf]
