# Supplementary material
Source: HighWire-hosted journal article supplement (https://ard.bmj.com/content/79/8/1111)

**A**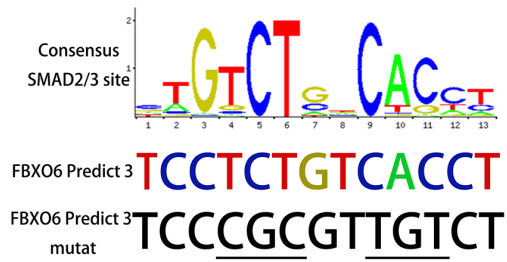**B**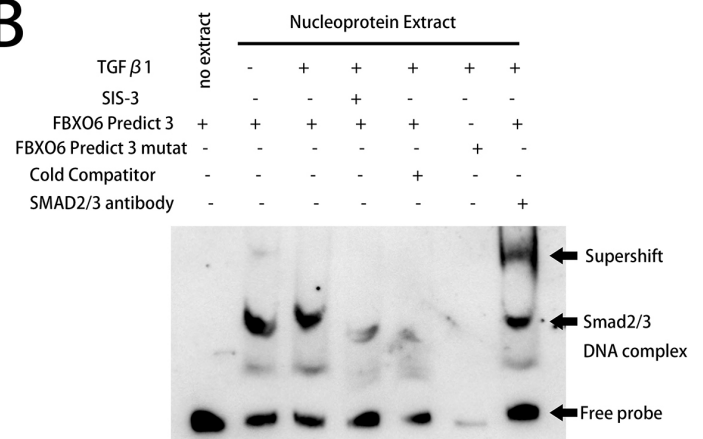

Supplement: inline-supplementary-material-9 [file inline-supplementary-material-9.pdf]
